# Supplementary material for: Mental Health Conditions and Nonpersistence of Direct Oral Anticoagulant Use in Patients With Incident Atrial Fibrillation: A Nationwide Cohort Study
Source: PubMed Central journal article supplement — J Am Heart Assoc. 2022 Mar 1;11(6):e024119. doi: 10.1161/JAHA.121.024119 (PMC9075274; doi:10.1161/jaha.121.024119), 2022-03-01

# **Supplemental Material**

**Table S1. Definitions of the comorbidities.**

|                          | ICD-10                                                                                                                                                                                                                                    | ICPC-2                     | Reimbursement code | ATC code                                                     |
|--------------------------|-------------------------------------------------------------------------------------------------------------------------------------------------------------------------------------------------------------------------------------------|----------------------------|--------------------|--------------------------------------------------------------|
| Hypertension             | I10-I15                                                                                                                                                                                                                                   | K85, K86, K87              | 205                | C03A, C03B,<br>C03DB,<br>C03EA,<br>C07A, C08CA,<br>C08D, C09 |
| Dyslipidemia             | E78                                                                                                                                                                                                                                       | T93                        | 206                | C10                                                          |
| History of heart failure | I50, I11.0, I13.0,<br>I13.2                                                                                                                                                                                                               | K77                        | 201                |                                                              |
| Diabetes                 | E10-E14                                                                                                                                                                                                                                   | T89, T90                   | 103, 215           | A10                                                          |
| Previous stroke          | I63, I64, I69.3-<br>I69.8                                                                                                                                                                                                                 | K90                        |                    |                                                              |
| Vascular disease         | I20-I25, I65-I66,<br>I67.2, I70                                                                                                                                                                                                           | K74, K75, K76,<br>K91, K92 | 206                |                                                              |
| Bleeding history         | D50.0, D62,<br>D68.3, I60-I62,<br>I69.0-I69.2, I85.0,<br>I86.4, J94.2,<br>K22.1, K22.3,<br>K22.6, K25.0,<br>K25.2,<br>K25.4, K25.6,<br>K26.0, K26.2,<br>K26.4, K26.6,<br>K27.0, K27.2,<br>K27.4, K27.6,<br>K28.0, K28.2,<br>K28.4, K28.6, |                            |                    |                                                              |

|               |                                                                                                |  |  |  |
|---------------|------------------------------------------------------------------------------------------------|--|--|--|
|               | K29.0, K62.5,<br>K63.1, K63.3,<br>K92.0-K92.2,<br>N02, R04, R31,<br>R58, S06.2-S06.6,<br>S06.8 |  |  |  |
| Alcohol abuse | F10                                                                                            |  |  |  |
| Dementia      | F00-F03, G30                                                                                   |  |  |  |

ATC, anatomic therapeutic chemical; ICD-10, International Classification of Diseases, Tenth Revision; ICPC-2, International Classification of Primary Care, Second Edition.

**Table S2. Sensitivity analysis of the incidence of DOAC non-persistence with 105- and 135-day gaps in DOAC purchases as the non-persistence event**

| Non-persistence definition         | Clinical condition | Events | Proportion of patients with events | Patient-years | Incidence (per patient-year) | Unadjusted IRR      | Adjusted IRR        |
|------------------------------------|--------------------|--------|------------------------------------|---------------|------------------------------|---------------------|---------------------|
| 105-day gap without DOAC purchases | No MHC             | 18 964 | 34.2%                              | 60 561        | 0.313 (0.309-0.318)          | (Reference)         | (Reference)         |
|                                    | Any MHC            | 4 324  | 35.9%                              | 12 253        | 0.353 (0.343-0.364)          | 1.127 (1.090-1.165) | 1.140 (1.101-1.179) |
|                                    | Depression         | 1 167  | 36.1%                              | 3 163         | 0.369 (0.348-0.391)          | 1.178 (1.111-1.250) | 1.219 (1.147-1.296) |
|                                    | Bipolar disorder   | 125    | 41.4%                              | 267           | 0.468 (0.393-0.558)          | 1.495 (1.254-1.782) | 1.499 (1.254-1.790) |
|                                    | Anxiety disorder   | 480    | 35.8%                              | 1 336         | 0.359 (0.328-0.393)          | 1.147 (1.048-1.256) | 1.222 (1.115-1.339) |
|                                    | Schizophrenia      | 103    | 30.0%                              | 301           | 0.343 (0.282-0.416)          | 1.094 (0.901-1.328) | 1.164 (0.958-1.414) |
| 135-day gap without DOAC purchases | No MHC             | 9 587  | 17.3%                              | 71 968        | 0.133 (0.131-0.136)          | (Reference)         | (Reference)         |
|                                    | Any MHC            | 2 269  | 18.8%                              | 14 846        | 0.153 (0.147-0.159)          | 1.147 (1.096-1.201) | 1.175 (1.121-1.233) |
|                                    | Depression         | 1 408  | 19.2%                              | 3 830         | 0.162 (0.150-0.175)          | 1.215 (1.121-1.318) | 1.323 (1.216-1.439) |
|                                    | Bipolar disorder   | 73     | 24.2%                              | 345           | 0.212 (0.168-0.266)          | 1.590 (1.263-2.002) | 1.731 (1.370-2.186) |
|                                    | Anxiety disorder   | 237    | 17.7%                              | 1 623         | 0.146 (0.129-0.166)          | 1.096 (0.964-1.247) | 1.262 (1.108-1.438) |
|                                    | Schizophrenia      | 59     | 17.2%                              | 345           | 0.171 (0.133-0.221)          | 1.285 (0.994-1.659) | 1.537 (1.187-1.989) |

IRR, incidence rate ratio; MHC, mental health condition. 95% confidence intervals in parenthesis. Adjusted IRRs estimated by Poisson regression.

**Table S3. Sensitivity analysis of the incidence of DOAC non-persistence in patients with only a single MHC, more than one MHC and any diagnosed MHC.**

| Clinical condition    | Patients (n) | Events (n) | Proportion of patients with events | Patient-years | Incidence (per patient-year) | Unadjusted IRR      | Adjusted IRR        |
|-----------------------|--------------|------------|------------------------------------|---------------|------------------------------|---------------------|---------------------|
| No MHC                | 55 454       | 12 039     | 21.7%                              | 68 872        | 0.175 (0.172-0.178)          | (Reference)         | (Reference)         |
| Any diagnosed MHC     | 4 367        | 1 049      | 24.0%                              | 4 900         | 0.214 (0.202-0.227)          | 1.225(1.150-1.305)  | 1.297 (1.215-1.385) |
| Only depression       | 2 496        | 616        | 24.7%                              | 2 814         | 0.219 (0.202-0.237)          | 1.252 (1.155-1.358) | 1.293 (1.189-1.405) |
| Only bipolar disorder | 130          | 38         | 29.2%                              | 147           | 0.258 (0.188-0.354)          | 1.474 (1.072-2.027) | 1.494 (1.084-2.060) |
| Only anxiety disorder | 697          | 141        | 20.2%                              | 826           | 0.171 (0.145-0.201)          | 0.976 (0.827-1.153) | 1.052 (0.892-1.245) |
| Only schizophrenia    | 260          | 55         | 21.2%                              | 256           | 0.215 (0.165-0.280)          | 1.228 (0.943-1.601) | 1.392 (1.066-1.817) |
| More than 1 MHC       | 784          | 199        | 25.4%                              | 856           | 0.232 (0.202-0.267)          | 1.329 (1.156-1.529) | 1.535 (1.332-1.770) |

IRR, incidence rate ratio; MHC, mental health condition. 95% confidence intervals in parenthesis. Adjusted IRRs estimated by Poisson regression and adjusted for age, sex, calendar year, heart failure, hypertension, diabetes, prior stroke, vascular disease, prior bleeding, alcohol abuse, renal failure, liver cirrhosis or failure, dementia, income, DOAC dosage and polypharmacy.

**Figure S1. Flow-chart of the patient selection process.**

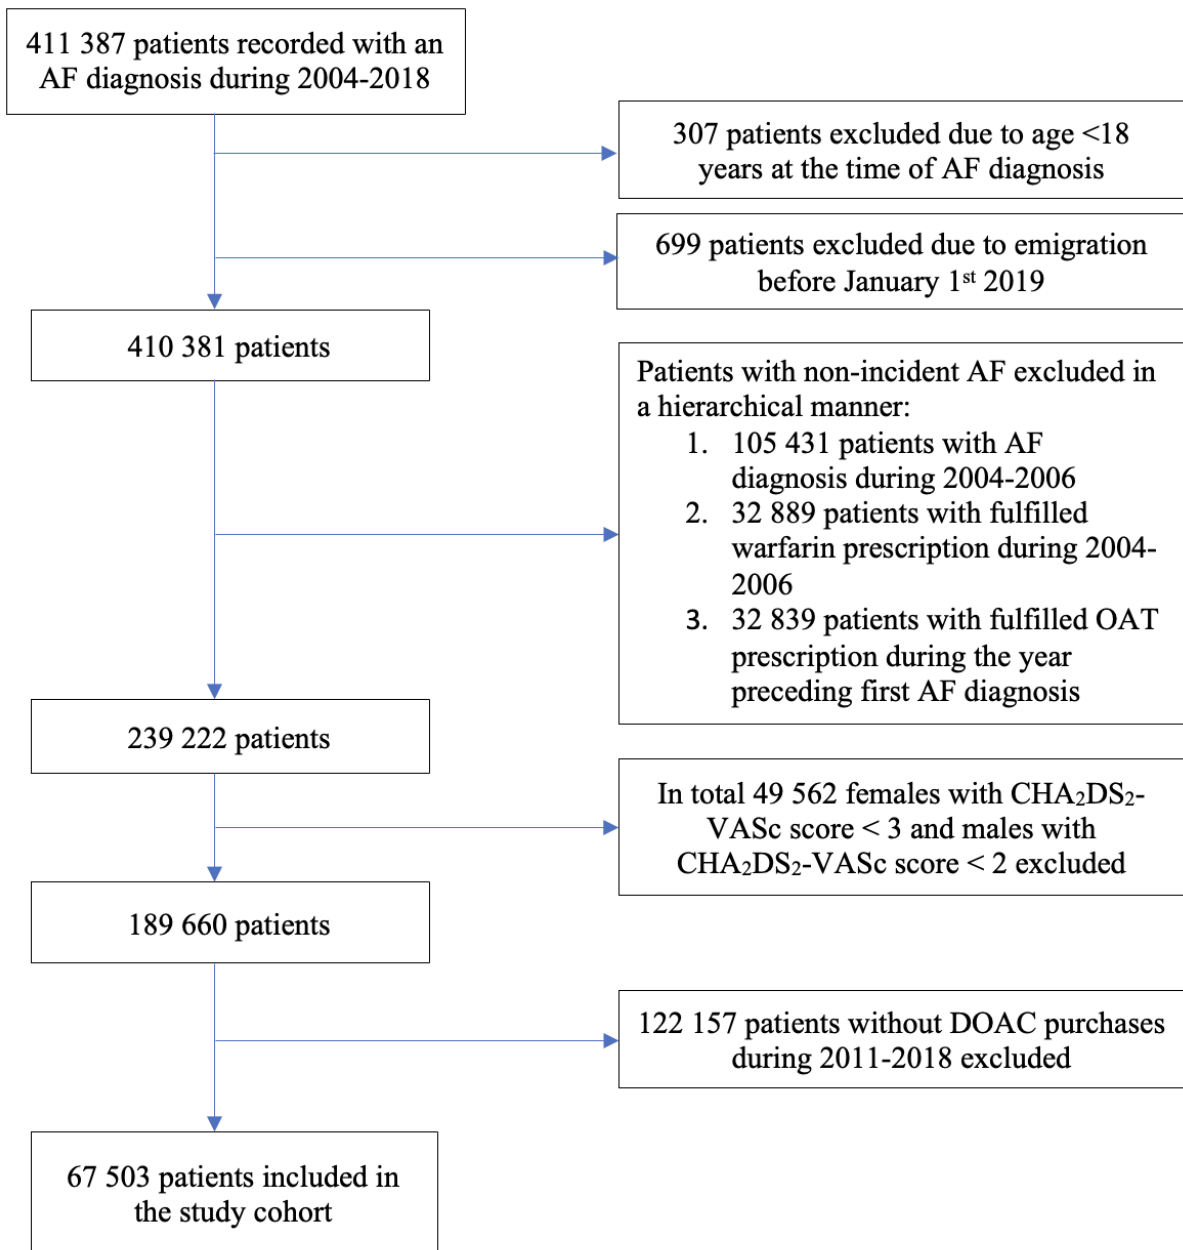

Supplement: JAH3-11-e024119-s001.pdf [file JAH3-11-e024119-s001.pdf]
